# Supplementary material for: Btbd6-dependent Plzf recruitment to Cul3 E3 ligase complexes through BTB domain heterodimerization
Source: bioRxiv or medRxiv preprint supplement (doi:10.1101/575910), 2019-03-12
Supplement: Supplementary file [file media-1.pdf]

## Supplementary Information

BTBD6-dependent PLZF recruitment to Cul3 E3 ligase complexes through  
BTBdomain  
heterodimerization

Mohamed Ismail, Stephen R. Martin, Neil J Ball, Steven Howell, David G. Wilkinson  
& Stephen J. Smerdon

The Francis Crick Institute, 1 Midland Rd, London NW1 1AT, UK

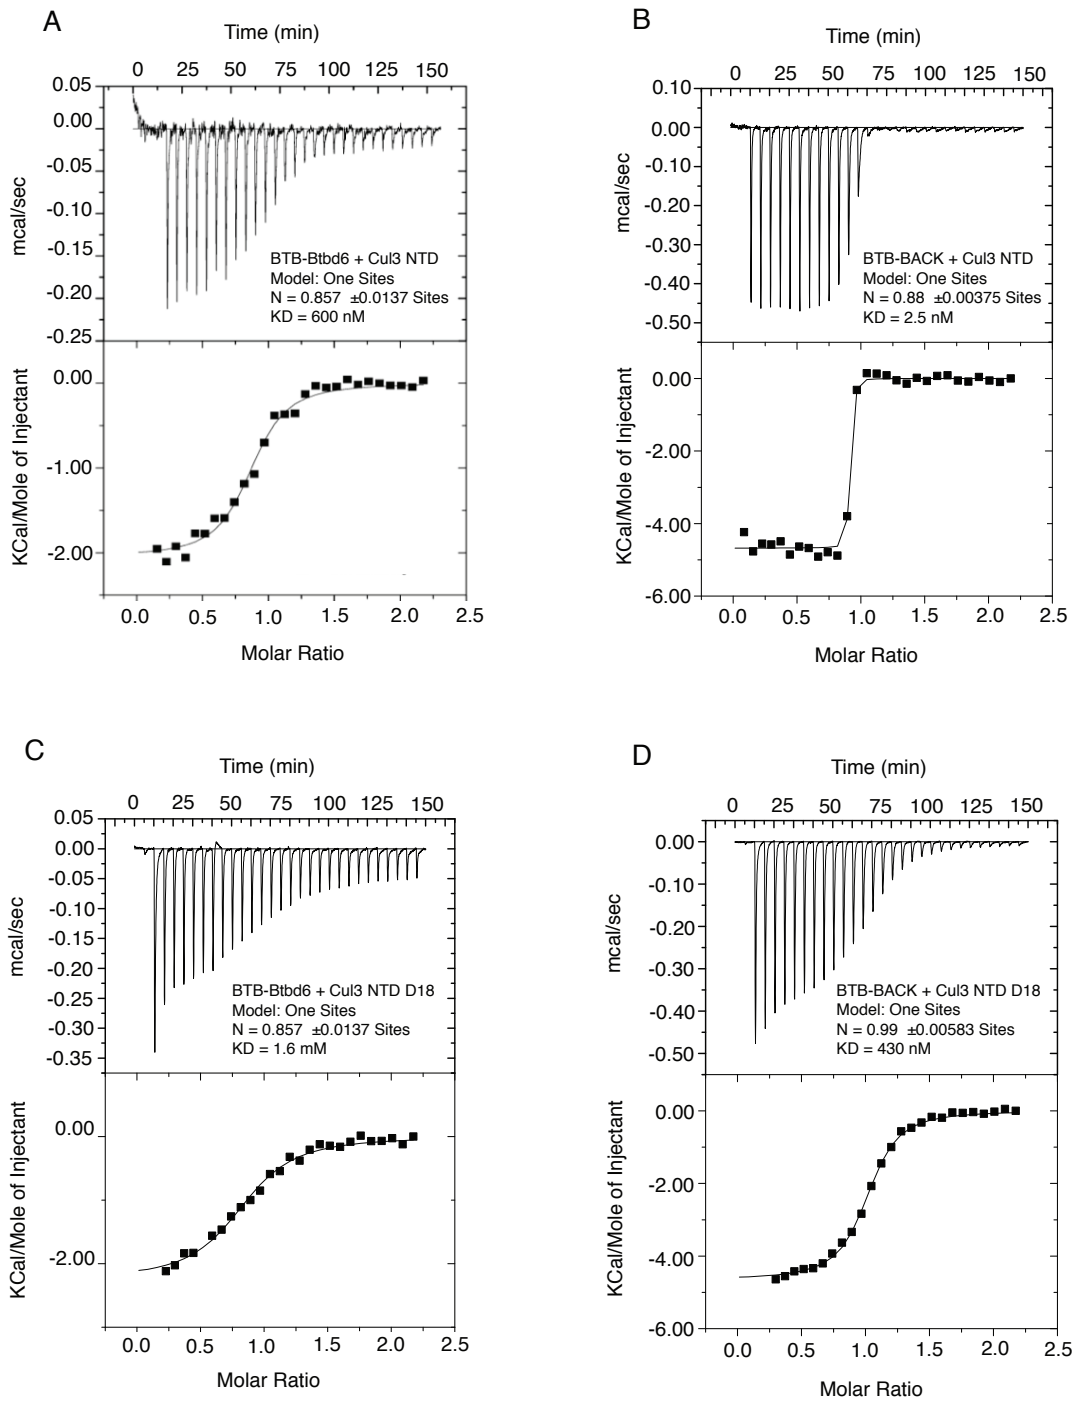

**Figure S1** - A and B) ITC analysis of BTB-Btd6 and BTB-BACK interactions with Cul3NTD, showing that the addition of the BACK domain strongly enhances the interaction with Cul3 NTD. C and D) ITC data showing that deleting the first 18aa of Cul3 reduced the strength of the interaction with BTB-Btd6 and BTB-BACK.

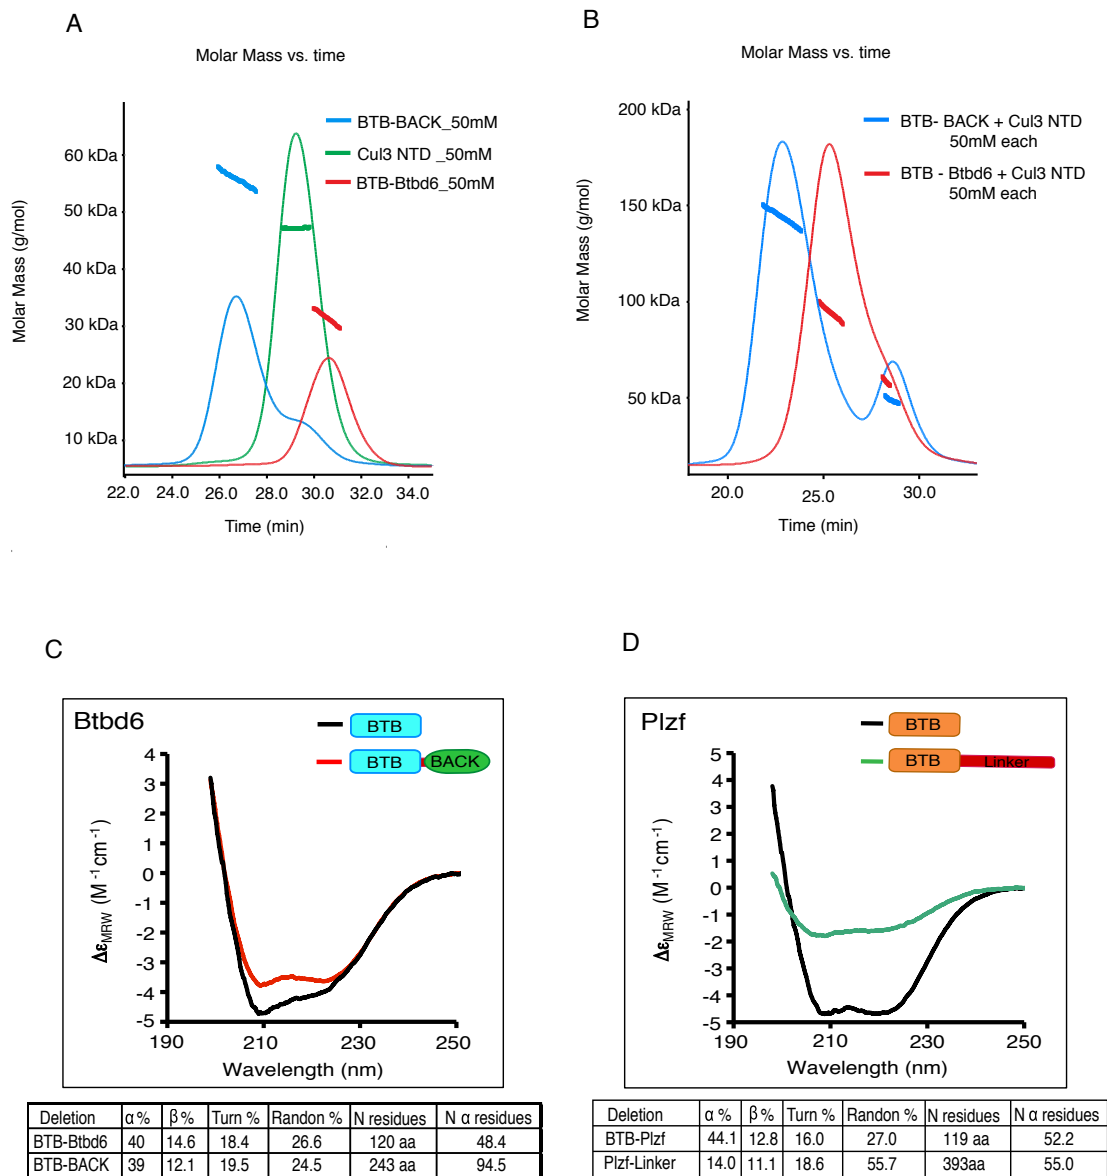

**Figure S2** - A and B) SEC-MALS experiments on BTB-Btd6, BTB-BACK and Cul3 NTD individually (A), and in the mixtures BTB-Btd6+Cul3 NTD or BTBBACK+Cul3 NTD (B). C) Circular dichroism on BTB-Btd6, BTB-BACK, in comparison with BTB-Plzf (D), showing the BACK domain of BTB-Btd6 is helical, whereas the linker following the BTB-Plzf lacks helical structure.

## **Supplementary Materials & Methods**

### **Isothermal Titration Calorimetry (ITC)**

ITC was carried out using a VP-ITC calorimeter (MicroCal, USA). Proteins were equilibrated with a buffer containing 20 mM Tris-HCl pH 8.3, 150 mM NaCl, 0.5 mM TCEP. Typically, 10  $\mu$ l aliquots of protein domains (BTB-Btbd66 or BTB-BACK) at a syringe concentration of 300  $\mu$ M were titrated over 30 injections into Cul3 protein at a concentration in the ITC cell of 30  $\mu$ M. Data were corrected for heats of dilution and analysed using the Origin 5.0 software.

### **Circular Dichroism (CD)**

Far-UV CD spectra were recorded on a Jasco J-815 spectropolarimeter fitted with a cell holder thermostatted by a CDF-426S Peltier unit. All CD measurements were made in 25mM Tris, 100mM NaCl and 0.5mM TCEP using fused silica cuvettes with 1-mm path length (Hellma, Jena, Germany). The spectra were typically recorded with 0.1-nm resolution and baseline corrected by subtraction of the appropriate buffer spectrum. CD intensities are presented as the CD absorption coefficient calculated on a mean residue weight basis (DeMRW). Secondary structure content was estimated using methods described previously [1].

### **Supplementary References**

[1] Sreerama, N., and Woody, R.W. (2000). Estimation of protein secondary structure from circular dichroism spectra: Comparison of CONTIN, SELCON, and CDSSTR methods with an expanded reference set. *Anal. Biochem.* 287: 252-260.
